# Supplementary material for: Dynamic-gravimetric preparation of metrologically traceableprimary calibration standards for halogenated greenhouse gases
Source: Copernicus journal article supplement (doi:10.5194/amt-2018-30), 2018-02-05
Supplement: Supplementary file 1 [file amt-2018-30-supplement.pdf]

# Supplement for: Dynamic-gravimetric preparation of primary, metrologically traceable calibration standards for halogenated greenhouse gases

Myriam Guillevic<sup>1</sup>, Martin K. Vollmer<sup>2</sup>, Simon A. Wyss<sup>2</sup>, Daiana Leuenberger<sup>1</sup>, Andreas Ackermann<sup>1</sup>, Céline Pascale<sup>1</sup>, Bernhard Niederhauser<sup>1</sup>, and Stefan Reimann<sup>2</sup>

<sup>1</sup>Federal Institute of Metrology METAS, Bern, Switzerland

<sup>2</sup>Laboratory for Air Pollution and Environmental Technology, Empa, Swiss Federal Laboratories for Materials Science and Technology, Dübendorf, Switzerland

Correspondence to: M. Guillevic (myriam.guillevic@metas.ch)

## S1 Determination of mass loss rate of permeation devices

The mass loss  $q_m$  in ng/min due to permeation through the membrane of the permeation device is calculated using a linear fit based on multiple data of mass and time as measured by our magnetic suspension balance. This linear fit gives directly  $q_m$  and the associated standard deviation used in the uncertainty budget as  $Stab_{balance}$ . However, to calculate the expanded uncertainty of the mass loss it is needed to take into account the reading resolution of the balance. To include these in the uncertainty we decompose  $q_m$  into the first data point  $(m_1, t_1)$  and the final data point  $(m_2, t_2)$ .  $(m_1, t_1)$  is directly taken as the first data from the set used to calculate the linear fit.  $t_2$  is taken from the last data point of the set.  $m_2$  is re-calculated using the values of  $m_1$ ,  $t_1$ ,  $t_2$  and  $q_m$  so that is it consistent:

$$m_2 = m_1 - q_m \cdot (t_2 - t_1)$$

10 It is now possible to associate to each variable  $m_1$ ,  $m_2$ ,  $t_1$  and  $t_2$  the uncertainty of the reading resolution (respectively 0.0000005 g and 0.05 s, as reported in Table 2 of the main text).

## S2 Cryo-filling: dead volume correction

When filling a cylinder, at the end of the filling routine the nitrogen gas present in between the pneumatic valve V1 and the valve of the cylinder is lost. This is due to the saturation vapour pressure of nitrogen in equilibrium with the liquid nitrogen. This pressure is a function of liquid nitrogen temperature. Before doing any of the filling, we therefore determined how much gas is exactly lost, by measuring the residual pressure in this volume when the cylinder is filled with some air and placed in the filled liquid nitrogen bath.

For this test, the pressure gauge was placed directly in between the cylinder and V1. Synthetic air was filled in the cylinder placed in liquid nitrogen, V1 was closed, and the pressure was measured in this closed system. The pressure was at 800 hPa, in agreement with a liquid nitrogen temperature of  $-200\text{ }^{\circ}\text{C}$ .

To compensate for this loss, before switching valves V1 and V2 to start filling the cylinder, the interval in between V1 and the cylinder valve is flushed with the carrier gas three times and then filled at 800 hPa. This volume of gas is then trapped in the cylinder when the valves are switched at the beginning of the filling. This volume compensates for the approximately equivalent volume lost at the end.

### S3 Weighted linear fit: York algorithm

To calculate the weighted linear fit taking into account the standard uncertainties  $u_{R_{prep,i,j}}$  and  $u_{R_{meas,i,j}}$  of both  $R_{prep,i,j}$  and  $R_{meas,i,j}$ , we apply the York algorithm (York et al., 2004) as written in Cantrell (2008).  $u_{R_{prep,i,j}}$  are calculated according to Equ. 8 in the main text.  $u_{R_{meas,i,j}}$  are the standard deviation of the mean of  $R_{meas,i,j}$  and documented in Table S4.

First, input values are initialised. For a given substance  $j$ , and with  $i$  representing all accepted cylinder values (i.e. all values except outliers), we set:

$$\begin{aligned} x_i &= R_{prep,i,j} \\ y_i &= R_{meas,i,j} \\ w_{x_i} &= (1/u_{R_{prep,i,j}}^2) \\ w_{y_i} &= (1/u_{R_{meas,i,j}}^2) \\ a &= 1 \\ r_i &= 0 \\ \alpha_i &= \sqrt{w_{x_i} \cdot w_{y_i}} \end{aligned}$$

The following algorithm is then ran 10 times:

$$\begin{aligned} W_i &= \frac{w_{x_i} \cdot w_{y_i}}{w_{x_i} + a^2 \cdot w_{y_i} - 2 \cdot a \cdot r_i \cdot \alpha_i} \\ \bar{x} &= \frac{\sum W_i \cdot x_i}{\sum W_i} \\ \bar{y} &= \frac{\sum W_i \cdot y_i}{\sum W_i} \\ U_i &= x_i - \bar{x} \\ V_i &= y_i - \bar{y} \\ B_i &= W_i \cdot \left( \frac{U_i}{w_{y_i}} + \frac{a \cdot V_i}{w_{x_i}} - (a \cdot U_i + V_i) \cdot \frac{r_i}{\alpha_i} \right) \end{aligned}$$

$$a = \frac{\sum W_i \cdot B_i \cdot V_i}{\sum W_i \cdot B_i \cdot U_i}$$

After these ten runs (which are in this case more than necessary to reach convergence of  $a$ ), the final value for  $b$  is computed:

$$b = \bar{y} - a \cdot \bar{x}$$

5 The standard uncertainty ( $k = 1$ ) for the obtained parameters is calculated as follow:

$$\bar{B} = \frac{\sum W_i \cdot B_i}{\sum W_i}$$

$$\sigma_a = \sqrt{\frac{1}{\sum W_i \cdot (B_i - \bar{B})^2} \cdot \frac{1}{\sqrt{\text{length}(x_i)}}}$$

$$10 \quad \sigma_b = \sqrt{\frac{1}{\sum W_i} + (\bar{x} + \bar{B})^2 \cdot \sigma_a^2} \cdot \frac{1}{\sqrt{\text{length}(x_i)}}$$

#### S4 METAS-2015 scales for HFC-125 and HFO-1234yf

Diagrams presenting the experimental setup used to prepare reference gas mixtures for HFC-125 and HFO-1234yf are presented in Fig. S2 (permeation and cryo-filling) and Fig. S3 (additional dynamic dilution).

The main technical differences with the METAS-2017 preparation method are:

- 15 – the carrier gas is additionally purified at the beginning of the preparation, using a commercially available purification cartridge (Microtorr, SAES Getters).
- only one dilution step is used after the permeation chamber (MFC1, MFC2);
- only one cryo-filling routine is done for each cylinder (there are no multiple fillings). As a result each cylinder contains a reference gas mixture for only one substance.
- 20 – the reference gas mixture in the produced cylinder is at nmol/mol (ppb) level and therefore needs additional dilution. This is done dynamically using an setup called 'METAS 2-step-dilutor' already existing at METAS, based on two successive dynamic dilution steps (Fig. S3).
- the mixture exiting the '2-step-dilutor' is directly injected into the Medusa-GC-MS system in operation at Empa for measurement.

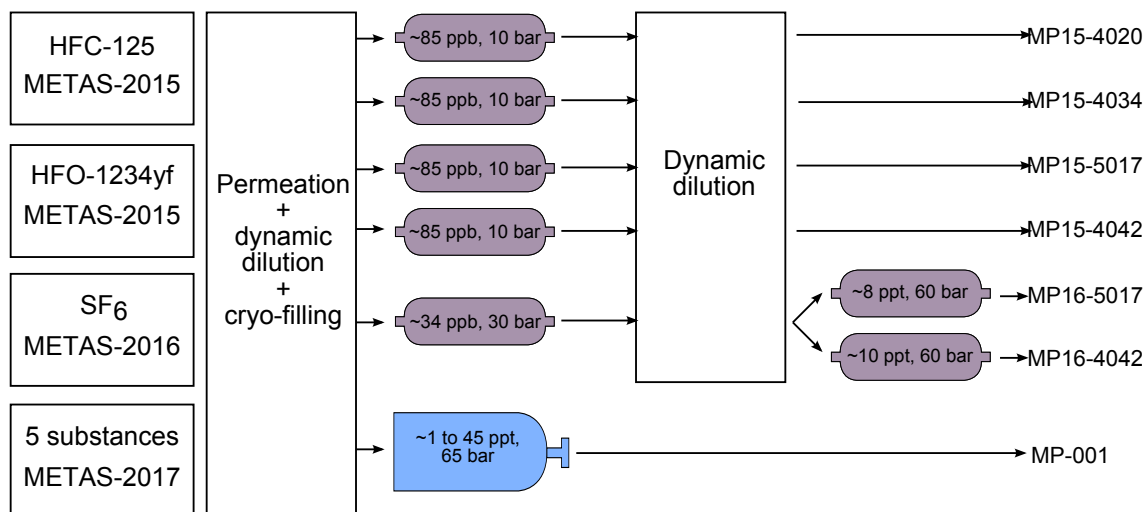

**Figure S1.** Overview of preparation steps for the 3 successive generations of scales prepared at METAS: METAS-2015, METAS-2016 and METAS-2017. The METAS-2017 scale is the most advanced scale in terms of minimisation of exposition to metal surfaces. ppb: nmol/mol. ppt: pmol/mol.

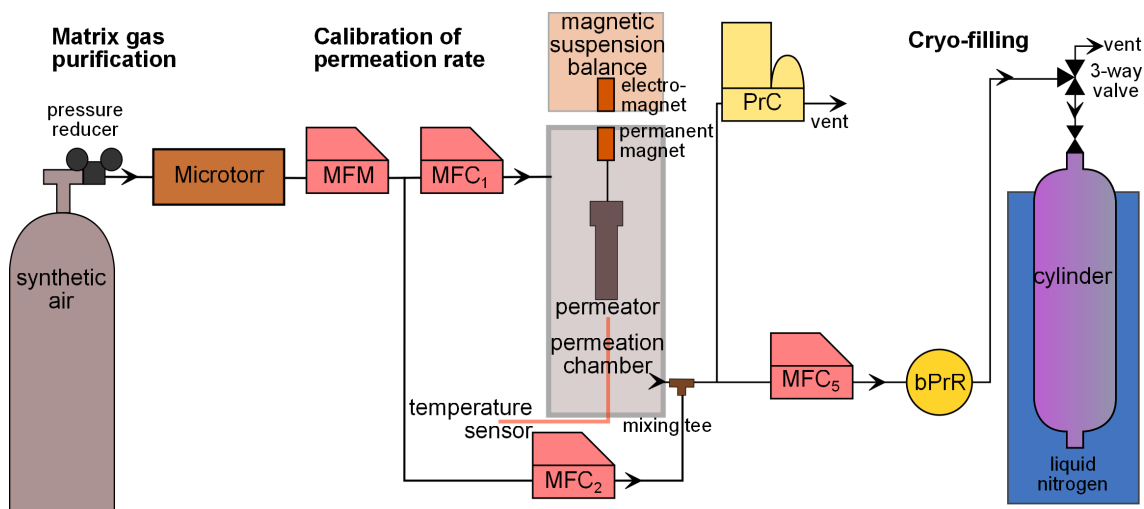

**Figure S2.** Preparation setup used to produce high concentration mixtures for HFC-125 and HFO-1234yf in cylinders.

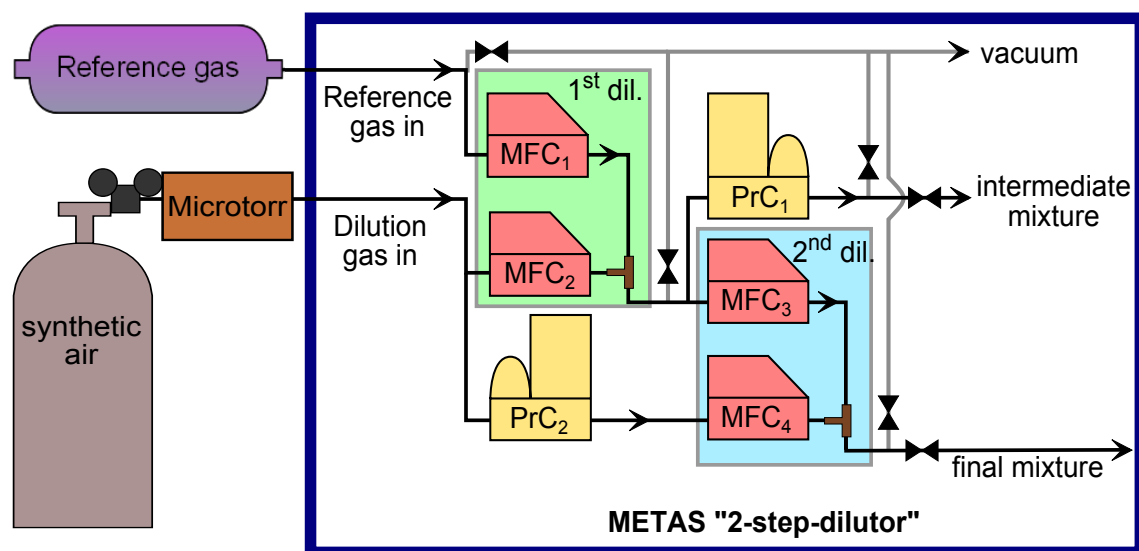

**Figure S3.** Schematic of METAS '2-step-dilutor', a two-stage dynamic dilutor based on thermal mass flow controllers. This setup is used to dilute the high concentration cylinders for HFC-125, HFO-1234yf and SF<sub>6</sub> (see preparation overview in Fig. S1). The final mixtures are at pmol/mol levels.

**Table S1.** Mass loss rate determination for each permeation device.

|                 | $m_1$ , g   | $m_2$ , g   | $t_1$ , s | $t_2$ , s | $q_m$ , ng/min | $Stab_{balance}$ , % ( $k = 1$ ) |
|-----------------|-------------|-------------|-----------|-----------|----------------|----------------------------------|
| SF <sub>6</sub> | 28.44957646 | 28.43612094 | 5999.45   | 14130.80  | 1654.77        | 0.2                              |
| HFC-125         | 28.56911448 | 28.56634188 | 1505.17   | 7128.32   | 493.07         | 0.4                              |
| HFO-1234yf      | 30.40242526 | 30.39984672 | 998.70    | 30205.77  | 88.28          | 0.41                             |
| HCFC-132b       | 29.46146154 | 29.46037128 | 89.83     | 10068.25  | 109.26         | 0.64                             |
| CFC-13          | 30.09772063 | 30.09634635 | 5999.55   | 12319.95  | 217.44         | 0.57                             |

**Table S2.** Flows used for the first and second dynamic dilution steps, in mL/min @ STP. MFM measures the total flow MFC1 + MFC2. MFC1 and MFC2 therefore do not need individual calibration.

|                          | MFC1 | MFC2 | MFM            | MFC3     | MFC4     |
|--------------------------|------|------|----------------|----------|----------|
| <b>Set points</b>        |      |      |                |          |          |
| SF <sub>6</sub>          | 167  | 4500 | -              | 10       | 5000     |
| HFC-125                  | 167  | 500  | -              | 10       | 4000     |
| HFO-1234yf               | 167  | 3500 | -              | 10       | 4000     |
| HCFC-132b                | 300  | 3500 | -              | 10       | 4000     |
| CFC-13                   | 300  | 3000 | -              | 10       | 4000     |
| water vapour             | 300  | 1200 | -              | not used | not used |
| <b>Calibrated values</b> |      |      |                |          |          |
| SF <sub>6</sub>          | -    | -    | 4594.968       | 10.809   | 5115.463 |
| HFC-125                  | -    | -    | 676.333        | 10.809   | 4109.936 |
| HFO-1234yf               | -    | -    | 3691.69        | 10.809   | 4109.936 |
| HCFC-132b                | -    | -    | 3817.535       | 10.809   | 4109.936 |
| CFC-13                   | -    | -    | 3333.618       | 10.809   | 4109.936 |
| water vapour             | -    | -    | not calibrated | not used | not used |

**Table S3.** Filling durations, in seconds.

| Cylinder        | MP-001 | MP-002 | MP-003 | MP-004 | MP-005 | MP-006 | MP-007 | MP-008 | MP-009 | MP-010 | MP-011 |
|-----------------|--------|--------|--------|--------|--------|--------|--------|--------|--------|--------|--------|
| SF <sub>6</sub> | 4018   | 2040   | 1546   | 1546   | 1915   | 1178   | 1178   | 1166   | 1296   | 1060   | 1190   |
| HFC-125         | 4018   | 2040   | 1546   | 1546   | 1915   | 1178   | 1178   | 1166   | 1296   | 1060   | 1190   |
| HFO-1234yf      | 4018   | 2040   | 1546   | 1546   | 1915   | 1178   | 1178   | 1166   | 1296   | 1060   | 0      |
| HCFC-132b       | 4018   | 2040   | 1546   | 1546   | 1915   | 1178   | 1178   | 1166   | 1296   | 1060   | 1190   |
| CFC-13          | 4018   | 2040   | 1546   | 1546   | 1915   | 1178   | 1178   | 1166   | 1296   | 1060   | 1190   |
| water vapour    | 24110  | 10200  | 8470   | 8470   | 6625   | 10310  | 7070   | 7130   | 6480   | 7660   | 8200   |

**References**

Cantrell, C. A.: Technical Note: Review of methods for linear least-squares fitting of data and application to atmospheric chemistry problems, Atmos. Chem. Phys., 8, 5477–5487, <https://doi.org/10.5194/acp-8-5477-2008>, <https://www.atmos-chem-phys.net/8/5477/2008/>, 2008.

York, D., Evensen, N. M., Martínez, M. L., and Delgado, J. D. B.: Unified equations for the slope, intercept, and standard errors of the best  
5 straight line, Am. J. Phys., 72, 367–375, <https://doi.org/10.1119/1.1632486>, <https://doi.org/10.1119/1.1632486>, 2004.

**Table S4.** Results of measured ratios without correction of analyser response. n is the number of replicate measurements. For cylinder MP-001, by default the ratio is set to 1, and we apply as standard deviation the average standard deviation over the set of cylinders, for each given substance.  $u_{R_{meas}}$  is the standard deviation of the mean.

| Cylinder              | MP-006 | MP-010 | MP-008 | MP-001 | MP-007 | MP-011 | MP-003 | MP-004 | MP-002 | MP-009 | MP-005 |
|-----------------------|--------|--------|--------|--------|--------|--------|--------|--------|--------|--------|--------|
| <b>SF<sub>6</sub></b> |        |        |        |        |        |        |        |        |        |        |        |
| $R_{meas}$            | 0.800  | 0.898  | 0.971  | 1.000  | 0.998  | 1.008  | 1.052  | 1.052  | 1.106  | 1.102  | 1.308  |
| n                     | 20     | 9      | 19     | 12     | 9      | 10     | 9      | 10     | 18     | 10     | 12     |
| $u_{R_{meas}}$        | 0.001  | 0.001  | 0.001  | 0.001  | 0.001  | 0.001  | 0.001  | 0.001  | 0.001  | 0.001  | 0.001  |
| <b>HFC-125</b>        |        |        |        |        |        |        |        |        |        |        |        |
| $R_{meas}$            | 0.804  | 0.905  | 0.978  | 1.000  | 1.004  | 1.015  | 1.049  | 1.051  | 1.120  | 1.111  | 1.308  |
| n                     | 20     | 10     | 17     | 12     | 9      | 9      | 10     | 10     | 18     | 10     | 12     |
| $u_{R_{meas}}$        | 0.001  | 0.001  | 0.001  | 0.001  | 0.001  | 0.001  | 0.001  | 0.001  | 0.001  | 0.001  | 0.002  |
| <b>HFO-1234yf</b>     |        |        |        |        |        |        |        |        |        |        |        |
| $R_{meas}$            | 0.799  | 0.846  | 0.931  | 1.000  | 0.995  | -      | 1.062  | 1.051  | 1.086  | 1.076  | 1.305  |
| n                     | 20     | 9      | 18     | 11     | 9      | -      | 10     | 10     | 19     | 10     | 12     |
| $u_{R_{meas}}$        | 0.003  | 0.002  | 0.003  | 0.003  | 0.003  | -      | 0.004  | 0.004  | 0.004  | 0.004  | 0.006  |
| <b>HCFC-132b</b>      |        |        |        |        |        |        |        |        |        |        |        |
| $R_{meas}$            | 0.799  | 0.881  | 0.979  | 1.000  | 1.002  | 1.010  | 1.079  | 1.049  | 1.094  | 1.096  | 1.300  |
| n                     | 19     | 9      | 18     | 12     | 9      | 10     | 10     | 10     | 19     | 10     | 12     |
| $u_{R_{meas}}$        | 0.001  | 0.002  | 0.002  | 0.002  | 0.002  | 0.002  | 0.002  | 0.002  | 0.002  | 0.002  | 0.002  |
| <b>CFC-13</b>         |        |        |        |        |        |        |        |        |        |        |        |
| $R_{meas}$            | 0.786  | 0.890  | 0.979  | 1.000  | 0.988  | 0.997  | 1.042  | 1.054  | 1.103  | 1.088  | 1.294  |
| n                     | 20     | 8      | 19     | 12     | 9      | 8      | 9      | 9      | 19     | 10     | 12     |
| $u_{R_{meas}}$        | 0.004  | 0.002  | 0.005  | 0.004  | 0.006  | 0.003  | 0.003  | 0.003  | 0.005  | 0.006  | 0.006  |



**Table S5.** Measured & corrected ratios using a linear fit.

| Cylinder              | MP-006 | MP-010 | MP-008 | MP-001 | MP-007 | MP-011 | MP-003 | MP-004 | MP-002 | MP-009 | MP-005 |
|-----------------------|--------|--------|--------|--------|--------|--------|--------|--------|--------|--------|--------|
| $R_{prep}$            | 0.800  | 0.900  | 0.990  | 1.000  | 1.000  | 1.010  | 1.050  | 1.050  | 1.100  | 1.100  | 1.300  |
| U                     | 0.002  | 0.003  | 0.003  | 0.003  | 0.003  | 0.003  | 0.003  | 0.003  | 0.003  | 0.003  | 0.004  |
| U, %                  | 0.3    | 0.3    | 0.3    | 0.3    | 0.3    | 0.3    | 0.3    | 0.3    | 0.3    | 0.3    | 0.3    |
| <b>SF<sub>6</sub></b> |        |        |        |        |        |        |        |        |        |        |        |
| $R_{meas,corr}$       | 0.804  | 0.899  | 0.971  | 0.999  | 0.998  | 1.007  | 1.051  | 1.050  | 1.103  | 1.099  | 1.301  |
| U                     | 0.007  | 0.008  | 0.008  | 0.008  | 0.009  | 0.009  | 0.009  | 0.009  | 0.009  | 0.009  | 0.011  |
| U, %                  | 0.9    | 0.9    | 0.9    | 0.8    | 0.9    | 0.8    | 0.8    | 0.8    | 0.8    | 0.8    | 0.8    |
| <b>HFC-125</b>        |        |        |        |        |        |        |        |        |        |        |        |
| $R_{meas,corr}$       | 0.802  | 0.901  | 0.974  | 0.996  | 1.000  | 1.011  | 1.044  | 1.045  | 1.114  | 1.106  | 1.300  |
| U                     | 0.007  | 0.008  | 0.009  | 0.009  | 0.009  | 0.009  | 0.009  | 0.009  | 0.010  | 0.010  | 0.011  |
| U, %                  | 0.9    | 0.9    | 0.9    | 0.9    | 0.9    | 0.9    | 0.9    | 0.9    | 0.9    | 0.9    | 0.9    |
| <b>HFO-1234yf</b>     |        |        |        |        |        |        |        |        |        |        |        |
| $R_{meas,corr}$       | 0.807  | 0.854  | 0.937  | 1.005  | 0.999  | NaN    | 1.065  | 1.054  | 1.089  | 1.080  | 1.305  |
| U                     | 0.014  | 0.014  | 0.015  | 0.016  | 0.016  | NaN    | 0.017  | 0.017  | 0.017  | 0.017  | 0.021  |
| U, %                  | 1.7    | 1.7    | 1.6    | 1.6    | 1.6    | NaN    | 1.6    | 1.6    | 1.6    | 1.6    | 1.6    |
| <b>HCFC-132b</b>      |        |        |        |        |        |        |        |        |        |        |        |
| $R_{meas,corr}$       | 0.800  | 0.883  | 0.981  | 1.001  | 1.004  | 1.012  | 1.080  | 1.050  | 1.095  | 1.097  | 1.301  |
| U                     | 0.011  | 0.011  | 0.012  | 0.013  | 0.013  | 0.013  | 0.014  | 0.013  | 0.014  | 0.014  | 0.016  |
| U, %                  | 1.3    | 1.3    | 1.3    | 1.3    | 1.3    | 1.3    | 1.3    | 1.3    | 1.3    | 1.3    | 1.2    |
| <b>CFC-13</b>         |        |        |        |        |        |        |        |        |        |        |        |
| $R_{meas,corr}$       | 0.799  | 0.901  | 0.988  | 1.009  | 0.997  | 1.006  | 1.050  | 1.062  | 1.109  | 1.095  | 1.297  |
| U                     | 0.014  | 0.014  | 0.016  | 0.016  | 0.017  | 0.016  | 0.017  | 0.017  | 0.018  | 0.018  | 0.021  |
| U, %                  | 1.7    | 1.6    | 1.7    | 1.6    | 1.7    | 1.6    | 1.6    | 1.6    | 1.6    | 1.6    | 1.6    |

**Table S6.** Scale comparison: individual cylinder measurement results and calculated average scale ratios. All measurements have been performed by Medusa-GC-MS at Empa Laboratories (see main text).

|                                         | <b>SF<sub>6</sub></b> | <b>HFC-125</b> | <b>HFO-1234yf</b> | <b>CFC-13</b> |
|-----------------------------------------|-----------------------|----------------|-------------------|---------------|
| <b>Individual cylinder measurements</b> |                       |                |                   |               |
| MP15-4020/J-170                         | -                     | 0.957          | -                 | -             |
| MP15-4034/J-170                         | -                     | 0.969          | -                 | -             |
| MP15-5017/EP-001                        | -                     | -              | 0.970             | -             |
| MP15-4042/EP-001                        | -                     | -              | 0.971             | -             |
| MP16-4042/J-191                         | 1.012                 | -              | -                 | -             |
| MP16-5017/J-191                         | 1.012                 | -              | -                 | -             |
| MP-001/E-094                            | 1.003                 | 0.927          | 0.910             | 1.049         |
| MP-001/E-108                            | 1.000                 | 0.927          | 0.910             | -             |
| MP-001/E-163                            | 1.002                 | 0.930          | 0.911             | -             |
| MP-001/J-191                            | 1.001                 | 0.930          | -                 | 1.050         |
| MP-001/J-206                            | 1.002                 | 0.931          | -                 | 1.067         |
| <b>Calculated average scale ratios</b>  |                       |                |                   |               |
| METAS-2016/SIO-05                       | 1.012                 | -              | -                 | -             |
| METAS-2015/SIO-14                       | -                     | 0.963          | -                 | -             |
| METAS-2015/Empa-2013                    | -                     | -              | 0.971             | -             |
| METAS-2017/SIO-05                       | 1.002                 | -              | -                 | -             |
| METAS-2017/SIO-14                       | -                     | 0.929          | -                 | -             |
| METAS-2017/Empa-2013                    | -                     | -              | 0.910             | -             |
| METAS-2017/Interim-98                   | -                     | -              | -                 | 1.055         |
| METAS-2017/METAS-2015                   | -                     | 0.964          | 0.938             | -             |
| METAS-2017/METAS-2016                   | 0.990                 | -              | -                 | -             |
